# Supplementary material for: Automating Periodontal bone loss measurement via dental landmark localisation
Source: PubMed Central journal article supplement (PMC8260405; doi:10.1007/s11548-021-02431-z), 2021-06-21
Supplement: 11548_2021_2431_MOESM1_ESM.pdf [file 11548_2021_2431_MOESM1_ESM.pdf]

# Supplementary Material: Automating Periodontal Bone Loss Measurement via Dental Landmark Localisation

Raymond Danks      Sophia Bano      Anastasiya Orishko  
Hong Jin Tan      Federico Moreno Sancho  
Francesco D'Aiuto      Danail Stoyanov

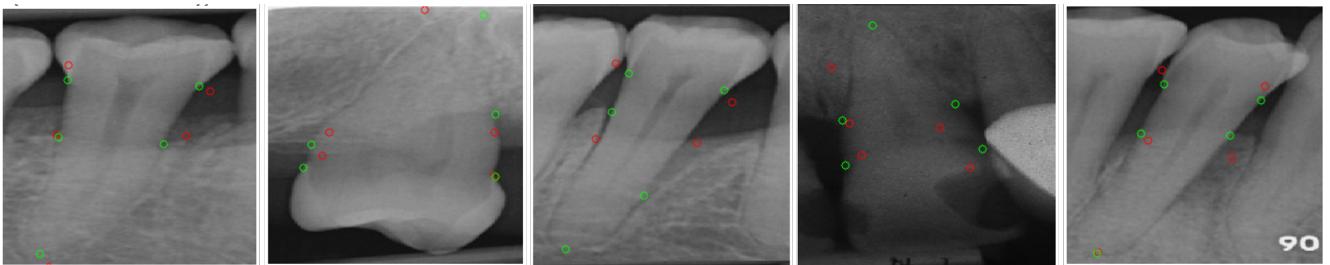

Figure 1: ResNet152 baseline qualitative performance (best viewed in colour)

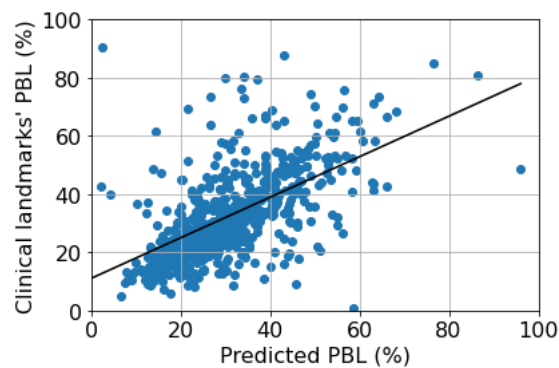

Figure 2: Predicted PBL vs PBL derived from clinicians' landmarks
